# Supplementary material for: A mouse model that is immunologically tolerant to reporter and modifier proteins
Source: PubMed Central journal article supplement (PMC7260180; doi:10.1038/s42003-020-0979-0), 2020-05-29
Supplement: 42003_2020_979_MOESM2_ESM.pdf [file 42003_2020_979_MOESM2_ESM.pdf]

## Description of Additional Supplementary Files

**File Name: Supplementary Data 1**

**Description:** Potential H2-Db and H2-Kb ligands derived from the Tol ORF, calculated by NetMHCpan and NetChop. All peptides annotated as strong or weak binders (% rank > 2.0) are provided.

**File Name: Supplementary Data 2**

**Description:**

EdgeR 3.9 output for RNAseq analysis of cerebrum, cerebellum and thymus from Tol and WT animals.

**File Name: Supplementary Data 3**

**Description:** Source data underlying the graphs and charts presented in the figures.
